# Supplementary material for: Exciton coupling in molecular salts of 2-(1,8-naphthalimido)ethanoic acid and cyclic amines: modulation of the solid-state luminescence
Source: Royal Society of Chemistry journal article supplement (doi:10.1039/c3ce41651h), 2013-01-01
Supplement: c3ce41651h.pdf [file c3ce41651h.pdf]

## Electronic Supporting Information

### Exciton coupling in molecular salts of 2-(1,8-naphthalimido)ethanoic acid and cyclic amines: modulation of the solid-state luminescence.

Simone d'Agostino,<sup>a</sup> Fabrizia Grepioni,<sup>\*,a</sup> Dario Braga,<sup>a</sup> Daniele Moreschi,<sup>a</sup> Valeria Fattori,<sup>b</sup>  
Francesca Delchiaro,<sup>a</sup> Simone Di Motta,<sup>a</sup> Fabrizia Negri<sup>\*,a</sup>

<sup>a</sup> Dipartimento di Chimica "G.Ciamician", Università di Bologna, Via selmi 2, 40126 Bologna (Italy). E-mail: fabrizia.grepioni@unibo.it, fabrizia.negri@unibo.it

<sup>b</sup> Istituto per la Sintesi Organica e la Fotoreattività (ISOF) – CNR Via Gobetti 101, 40129 Bologna (Italy).

---

| Content                                                                                   | Page |
|-------------------------------------------------------------------------------------------|------|
| XRPD patterns for crystalline <b>0-4</b>                                                  | 2    |
| TGA and DSC traces for crystalline <b>2-4</b>                                             | 2    |
| Equilibrium structures of the S <sub>0</sub> and S <sub>1</sub> electronic states of NEaH | 4    |
| Dimers present in crystalline NEaH ( <b>0</b> )                                           | 5    |
| Absolute energies of the ground and excited states of NEaH ( <b>0</b> )                   | 5    |
| Codes for the dimers in crystalline <b>0, 1</b> and <b>2</b>                              | 6    |
| Excitation energies and oscillator strengths of Frenkel exciton states                    | 6    |
| Sequences of dimers in crystals of <b>2</b>                                               | 7    |
| Sequences of dimers in crystals of <b>1</b>                                               | 7    |
| Transition dipole moments                                                                 | 8    |
| Crystallographic data and details of measurements for compounds <b>1-4</b>                | 9    |

---

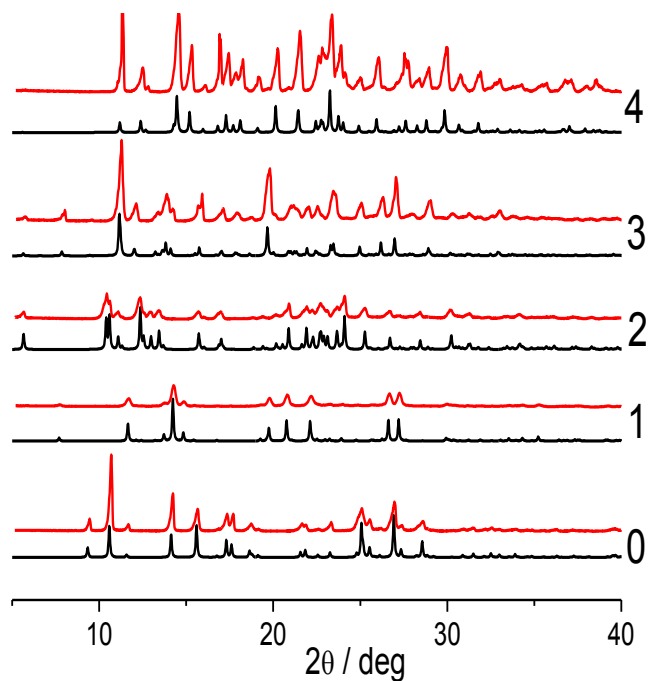

**Figure ESI1.** Comparison between calculated (black) and experimental (red, obtained from the kneading experiments) diffraction patterns for compounds **0-4**.

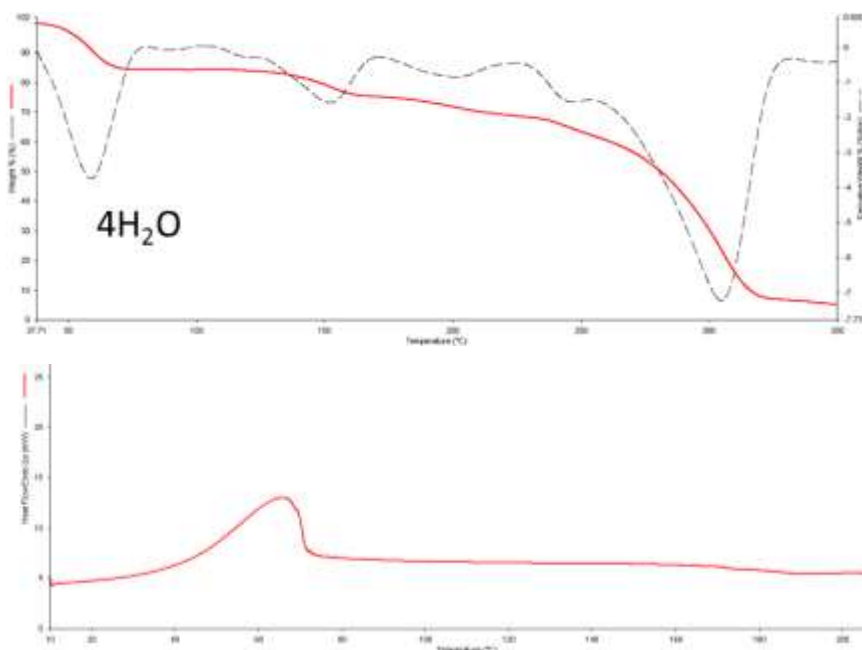

**Figure ESI2.** TGA (top) and DSC traces (bottom) for crystalline **2**.

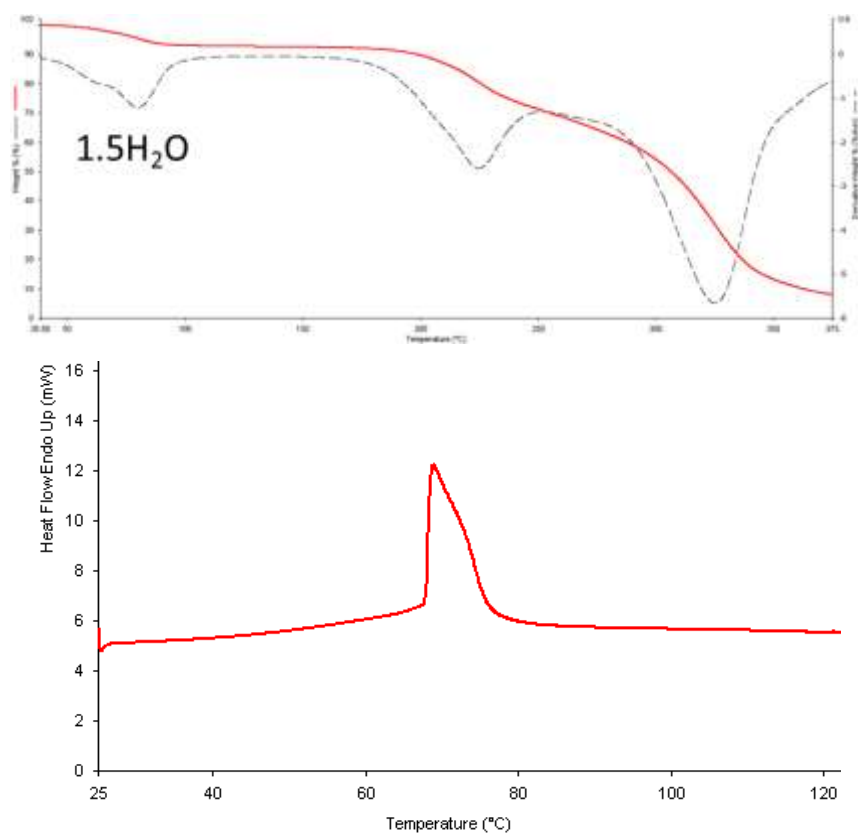

**Figure ESI3.** TGA (top) and DSC traces (bottom) for crystalline **3**.

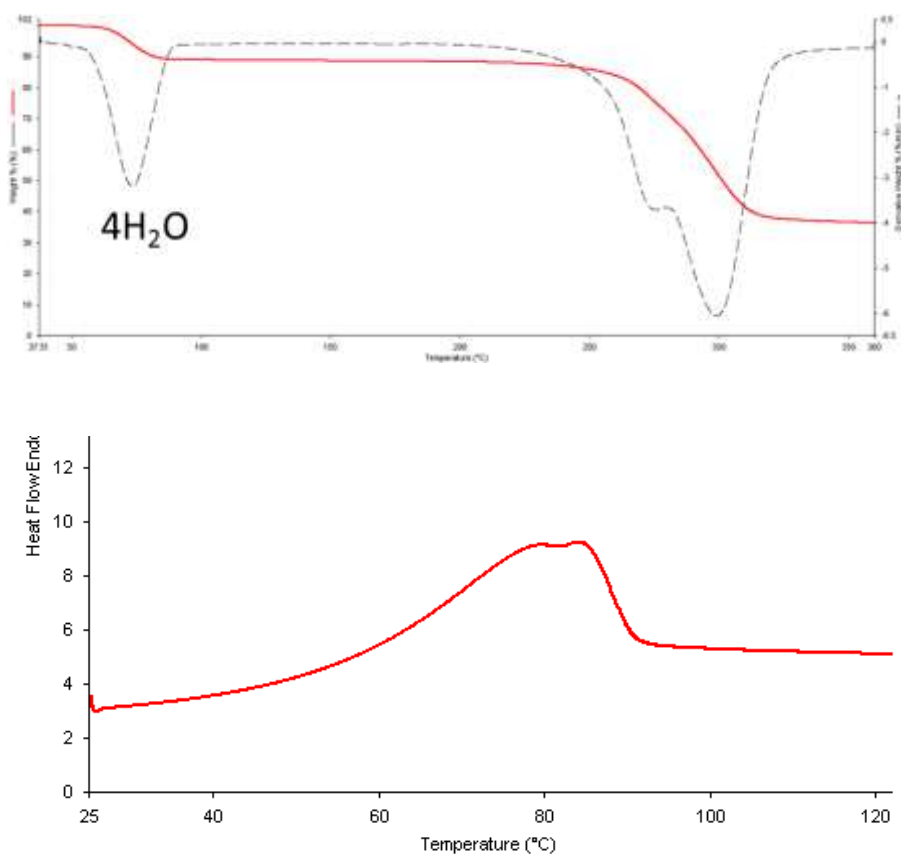

**Figure ESI4.** TGA (top) and DSC traces (bottom) for crystalline **4**.

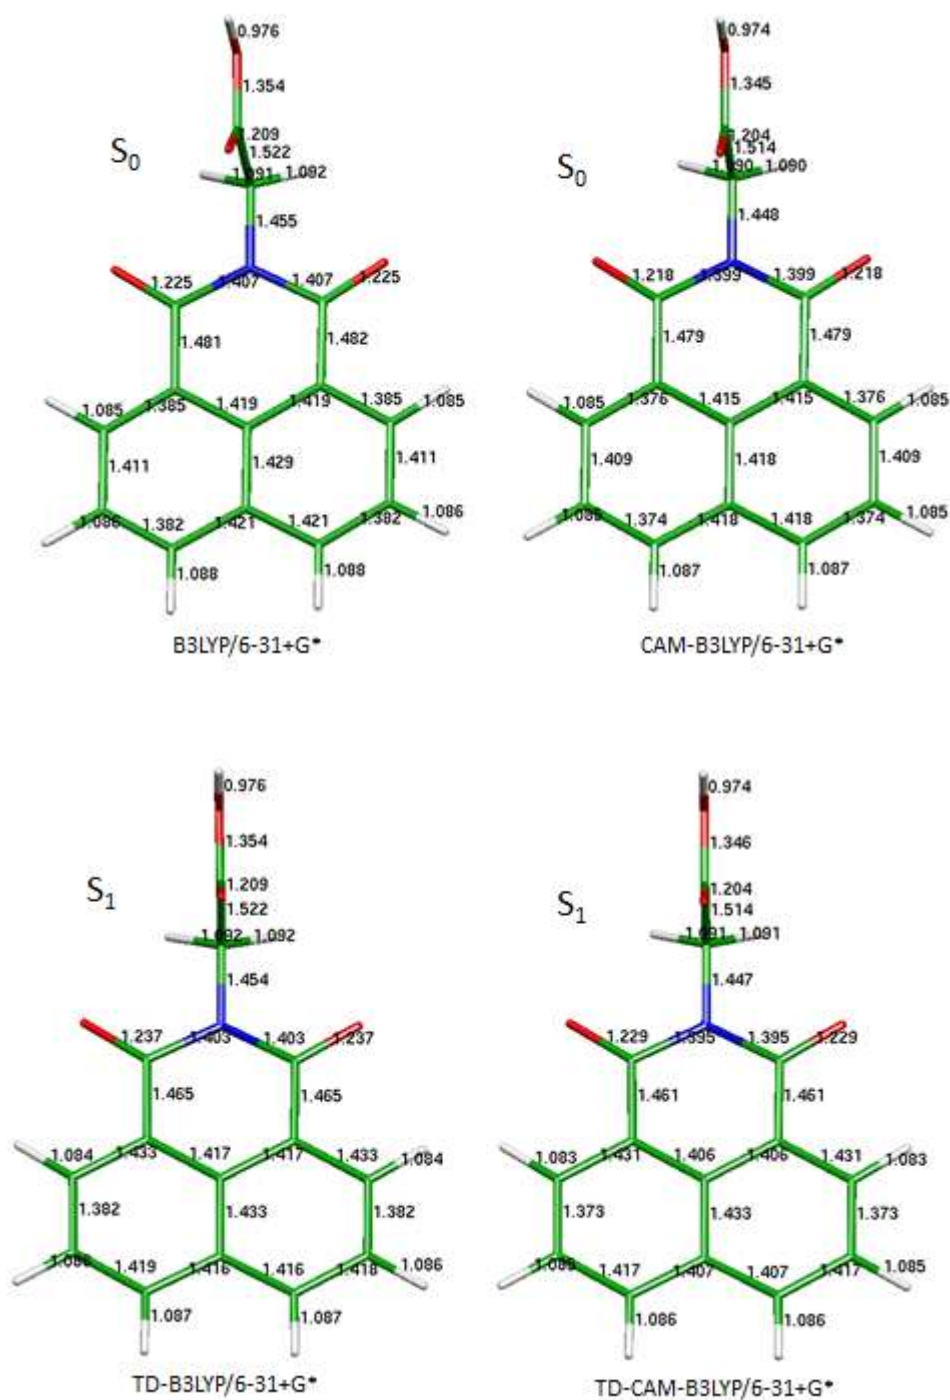

**Figure ESI5.** Equilibrium structures of the  $S_0$  (top) and  $S_1$  (bottom) electronic states of NEaH at B3LYP/6-31+G\* (left) and CAM-B3LYP/6-31+G\* (right) levels of theory.

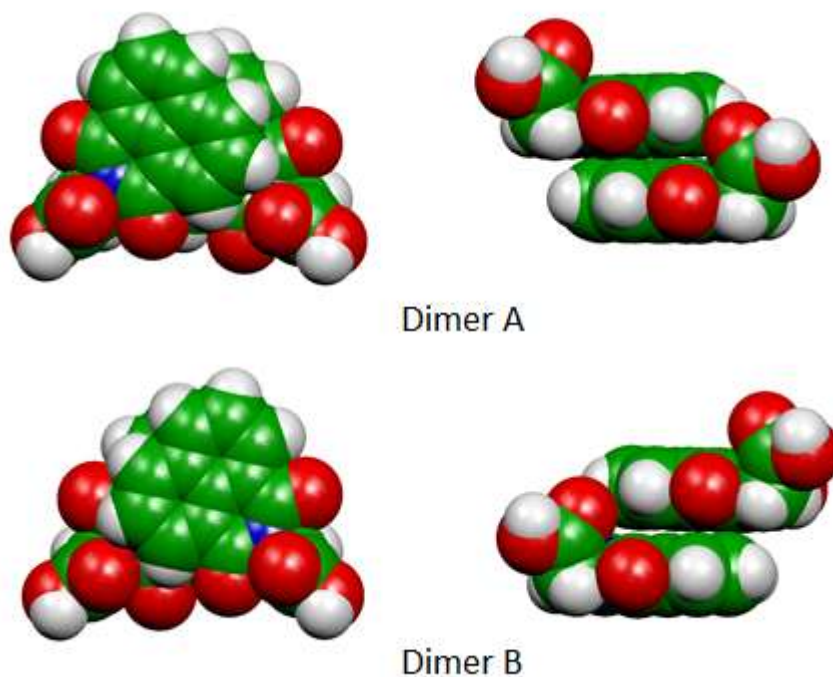

**Figure ESI6.** The dimers of compound **0** with the shortest intramolecular distance between centers of mass.

**Table ESI1.** Absolute energies of the ground and excited states of NEaH employed to evaluate the reorganization energies according to the AP method, computed reorganization energies and SS between absorption and emission spectra.

|                               | <i>B3LYP/6-31+G*</i> | <i>CAM-B3LYP/6-31+G*</i> |
|-------------------------------|----------------------|--------------------------|
| $E_{excited}^{geo-gr}$ / a.u. | -894.526054          | -894.094831              |
| $E_{excited}^{geo-ex}$ / a.u. | -864.532754          | -894.104349              |
| $E_{ground}^{geo-ex}$ / a.u.  | -864.658479          | -894.235773              |
| $E_{ground}^{geo-gr}$ / a.u.  | -864.661567          | -894.245196              |
| $\lambda_{excited}$ / eV      | 0.18                 | 0.26                     |
| $\lambda_{ground}$ / eV       | 0.18                 | 0.26                     |
| Computed SS                   | 0.36                 | 0.52                     |

**Table ESI2.** Codes for the dimers employed to calculate excitonic interactions, intermolecular distances and angles between transition dipole moment directions and distance vector computed at TDHF/6-31+G\* level of theory.

| Dimer | Distance between centers of mass/ Å | Angle between transition dipole moment directions <sup>a</sup> | compound | Angle between $\mu_1$ and $r_{12}$ | Angle between $\mu_2$ and $r_{12}$ |
|-------|-------------------------------------|----------------------------------------------------------------|----------|------------------------------------|------------------------------------|
| A     | 4.8523                              | 129                                                            | <b>0</b> | 56                                 | 135                                |
| B     | 4.9168                              | 129                                                            | <b>0</b> | 45                                 | 123                                |
| A     | 4.5969                              | 0                                                              | <b>1</b> | 63                                 | 63                                 |
| B     | 5.6200                              | 0                                                              | <b>1</b> | 55                                 | 55                                 |
| C     | 6.2498                              | 0                                                              | <b>1</b> | 73                                 | 73                                 |
| A     | 4.3202                              | 0                                                              | <b>2</b> | 87                                 | 87                                 |
| B     | 5.0556                              | 0                                                              | <b>2</b> | 39                                 | 39                                 |

<sup>a</sup> The discrepancy between the angles in **1** and **2** dimers (this table) and those reported Table 2 (main manuscript) is due to the fact that the *orientation* (not the direction) of the transition moments is arbitrary, and depends on the orbitals sign.

**Table ESI3.** Excitation energies ( $E$ ) and oscillator strengths ( $f$ ) of Frenkel exciton states from the supramolecular approach (TDHF/6-31+G\* calculations on dimers).

| Dimer | $E(S_1)/eV$ and $f$ | $E(S_2)/eV$ and $f$ | compound |
|-------|---------------------|---------------------|----------|
| A     | 4.26 (0.04)         | 4.42 (0.25)         | <b>0</b> |
| B     | 4.29 (0.04)         | 4.43 (0.26)         | <b>0</b> |
| A     | 4.36 (0.00)         | 4.41 (0.34)         | <b>1</b> |
| B     | 4.38 (0.00)         | 4.42 (0.38)         | <b>1</b> |
| C     | 4.41 (0.00)         | 4.44 (0.39)         | <b>1</b> |
| A     | 4.43 (0.00)         | 4.48 (0.40)         | <b>2</b> |
| B     | 4.27 (0.00)         | 4.50 (0.43)         | <b>2</b> |

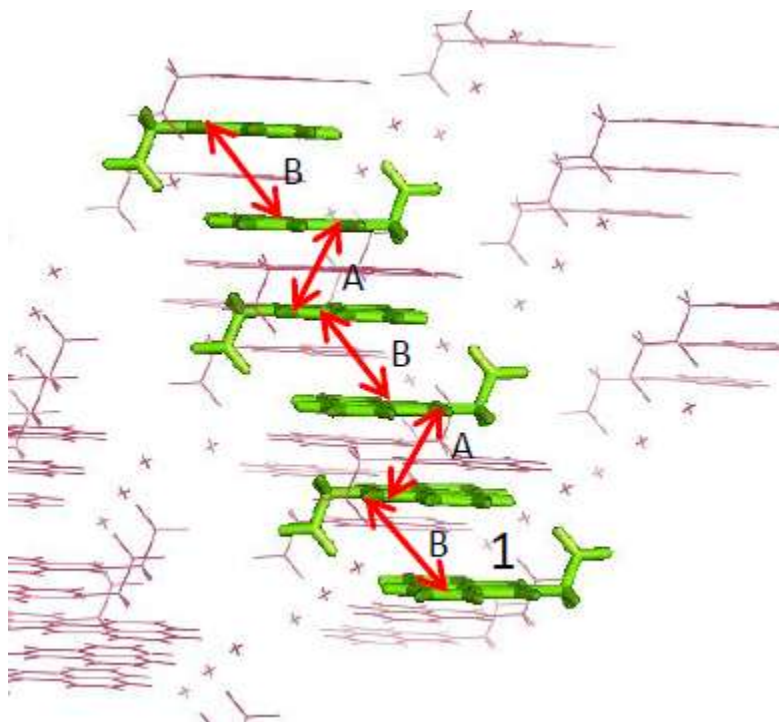

**Figure ESI7.** Sequences of dimers (A and B) detected along columns of naphthalimide moieties in crystalline **2**.

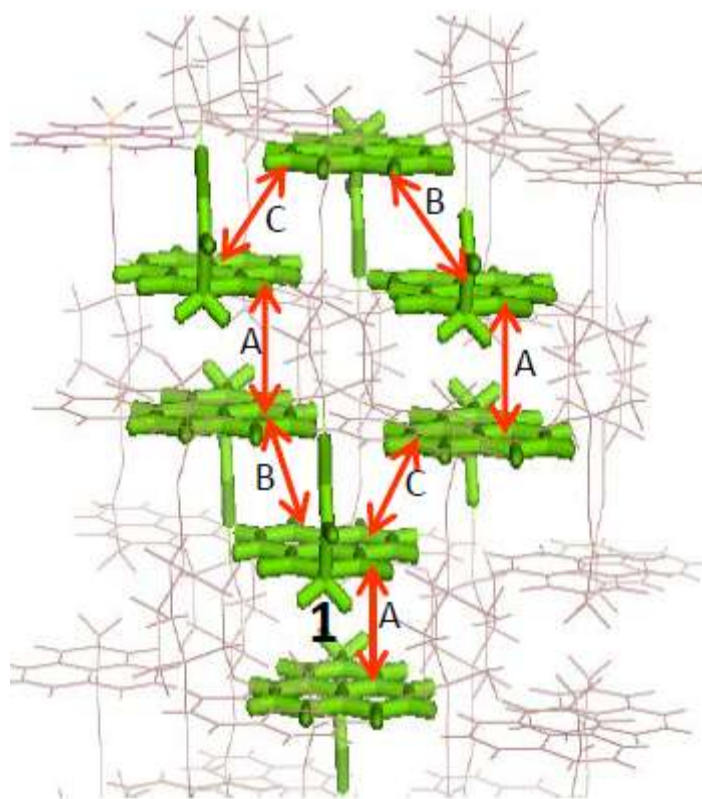

**Figure ESI8.** Sequences of dimers (A, B and C) detected along columns of naphthalimide moieties in crystalline **1**.

**Table ESI4.** Transition dipole moments (TDHF/6-31+G\*) of the monomers forming the molecular dimers and displacement vectors  $r_{12}$  employed to evaluate exciton couplings within the PDA approximation.

| Dimer<br>(compound) | <i>vector</i> | <i>x, y, z components</i> |
|---------------------|---------------|---------------------------|
| <b>A (0)</b>        | $\mu_1$       | 0.6237 -1.3460 0.1841     |
|                     | $\mu_2$       | 0.6161 1.3503 0.1818      |
|                     | $r_{12}$      | 0.1196 -3.4002 -3.4596    |
| <b>B (0)</b>        | $\mu_1$       | 0.6237 -1.3460 0.1841     |
|                     | $\mu_2$       | 0.6161 1.3503 0.1818      |
|                     | $r_{12}$      | -0.1227 -3.4002 -3.5495   |
| <b>A (1)</b>        | $\mu_1$       | -0.1144 -0.2164 -1.4302   |
|                     | $\mu_2$       | -0.1137 -0.2245 -1.4254   |
|                     | $r_{12}$      | -3.8777 -0.4061 2.4351    |
| <b>B (1)</b>        | $\mu_1$       | -0.1144 -0.2164 -1.4302   |
|                     | $\mu_2$       | -0.1145 -0.2242 -1.4251   |
|                     | $r_{12}$      | 2.8316 4.1996 2.4351      |
| <b>C (1)</b>        | $\mu_1$       | -0.1144 -0.2164 -1.4302   |
|                     | $\mu_2$       | -0.1145 -0.2242 -1.4251   |
|                     | $r_{12}$      | 2.8316 -5.0112 2.4351     |
| <b>A (2)</b>        | $\mu_1$       | -0.6618 0.1741 -1.2923    |
|                     | $\mu_2$       | -0.6618 0.1741 -1.2923    |
|                     | $r_{12}$      | 3.6523 1.1892 -1.9776     |
| <b>B (2)</b>        | $\mu_1$       | -0.6618 0.1741 -1.2923    |
|                     | $\mu_2$       | -0.6618 0.1741 -1.2923    |
|                     | $r_{12}$      | -4.4982 1.1892 -1.9776    |



**Table ESI5.** Crystallographic data and details of measurements for compounds **1** – **4**.

|                                               | <b>1</b>                                                      | <b>2</b>                                                      | <b>3</b>                                                        | <b>4</b>                                                       |
|-----------------------------------------------|---------------------------------------------------------------|---------------------------------------------------------------|-----------------------------------------------------------------|----------------------------------------------------------------|
| Formula                                       | C <sub>34</sub> H <sub>30</sub> O <sub>8</sub> N <sub>4</sub> | C <sub>21</sub> H <sub>30</sub> O <sub>8</sub> N <sub>2</sub> | C <sub>21</sub> H <sub>25</sub> N <sub>2</sub> O <sub>6.5</sub> | C <sub>32</sub> H <sub>36</sub> N <sub>4</sub> O <sub>12</sub> |
| fw                                            | 622.62                                                        | 438.47                                                        | 409.44                                                          | 668.64                                                         |
| Cryst. System                                 | Monoclinic                                                    | Triclinic                                                     | Triclinic                                                       | Monoclinic                                                     |
| Space group                                   | C2/c                                                          | P-1                                                           | P-1                                                             | P2 <sub>1</sub> /c                                             |
| Z                                             | 8                                                             | 2                                                             | 2                                                               | 4                                                              |
| a (Å)                                         | 13.4187(6)                                                    | 8.1505(6)                                                     | 9.2171(8)                                                       | 16.048(2)                                                      |
| b (Å)                                         | 9.2108(4)                                                     | 8.9476(8)                                                     | 13.770(1)                                                       | 6.7332(6)                                                      |
| c (Å)                                         | 23.0093(9)                                                    | 16.122(1)                                                     | 16.195(1)                                                       | 14.503(2)                                                      |
| α (deg)                                       | 90                                                            | 75.732(7)                                                     | 78.083(7)                                                       | 90                                                             |
| β (deg)                                       | 94.022(4)                                                     | 85.986(6)                                                     | 79.755(7)                                                       | 100.00(1)                                                      |
| γ (deg)                                       | 90                                                            | 77.938(7)                                                     | 81.159(7)                                                       | 90                                                             |
| V (Å <sup>3</sup> )                           | 2836.9(2)                                                     | 1114.1(2)                                                     | 1964.52                                                         | 1543.3(3)                                                      |
| D <sub>calc</sub> (Mg/m <sup>3</sup> )        | 1.458                                                         | 1.307                                                         | 1.384                                                           | 1.439                                                          |
| μ (mm <sup>-1</sup> )                         | 0.105                                                         | 0.100                                                         | 0.103                                                           | 0.111                                                          |
| Measured reflns                               | 7015                                                          | 8797                                                          | 15331                                                           | 6682                                                           |
| indep. reflns                                 | 3326                                                          | 5585                                                          | 8908                                                            | 3518                                                           |
| R1[onF <sub>0</sub> <sup>2</sup> , I > 2σ(I)] | 0.0552                                                        | 0.0574                                                        | 0.0984                                                          | 0.0642                                                         |
| wR2 (all data)                                | 0.1355                                                        | 0.1345                                                        | 0.2268                                                          | 0.1411                                                         |
| Residual electron density                     | 0.164                                                         | 0.184                                                         | 0.418                                                           | 0.216                                                          |
